# Supplementary material
Source: HighWire-hosted journal article supplement (doi:10.1101/rna.037663.112)

**Supplemental Material for the Submission**

Cell cycle dependent transcription factors control the expression of yeast telomerase RNA.

Isabelle Dionne, Stéphanie Larose, Alain T. Dandjinou, Sherif Abou Elela and Raymund J. Wellinger

## Supplemental Figure Legends

**Supplemental Figure S1.** Alignment of the *TLC1* promoter region obtained from different *Saccharomyces* “sensu stricto” species. The sequence from *S. cerevisiae* S288C (Scec), *S. cerevisiae* SK1 (Scek), *S. paradoxus* (Spar), *S. cariocanus* (Scar), *S. mikatae* (Smik), *S. kudriavzevii* (Skud), *S. bayanus* (Sbay) and *S. pastorianus* (Spas) were aligned according to the major 5'-end of Scec as indicated by +1. The numbering is indicated by vertical lines each 10 nucleotides according to Scec and dashes (-) denote gaps introduced to improve the alignment. Dashed underline nucleotides represent the coding sequence of *TLC1* (from +1 and downstream), *snR161* (-252 to -412) and *PDX3* (from -642 and upstream). The positions of the different TATA box-like sequence are indicated in italic bold (-75, -171 and -221). The positions of the MCB1/SCB1 (-108) and MCB2 (-120) are indicated in bold underlined. The consensus sequence (Cons) is shown at bottom with the uppercase, lower case and dots representing universally conserved, conserved (~ 75%) or variable nucleotides respectively. The conserved regions examined in this study are indicated by letters (A to G). The percent conservation is indicated below each region in brackets.

**Supplemental Figure S2. (A)** Schematic representation of the *TLC1* chromosomal locus and the flanking upstream genes. The start codon of *PDX3* as well as the 5'-ends of the mature *snR161* and *TLC1* RNAs are represented by arrows indicating the transcription direction. The identity of the conserved sequence motifs studied is indicated by letters. Some regions between the *PDX3* and *TLC1* genes are magnified at bottom. The position of the different 5'-ends of *TLC1* detected by primer extension performed in B is indicated by arrowheads and the name of the deletion is indicated on the left. Stars (\*) represent 5'-ends detected for specific deletions and the numbers indicated are relative to each deletion respectively and not to *TLC1* WT 5'-end. **(B)** Primer extension analysis of *TLC1* RNA derived from strains carrying different promoter deletions. The 5'-end was mapped using primer specific to *TLC1* sequence. DNA sequencing of a cloned *TLC1* gene was performed with the same primer and included on the left as a marker. Black arrowhead (+1) represents the major *TLC1* 5'-end while white arrowheads represent minor 5'-ends.

**Supplemental Figure S3.** RNA samples from strain BY4741 (WT), BY4741-*swi4*Δ and BY4741-*swi6*Δ were analyzed by qRT-PCR. The *TLC1* RNA levels were measured and normalized against Act1. The WT value is arbitrarily set to 1.

**Supplemental Figure S4.** qRT-PCR analysis of *Cln2* RNA levels at indicated time points for the same experiments as shown in Figure 5D. *CLN2* is a well-known cell cycle-regulated gene by SBF and serves here as a positive control for the synchronization and activation of the transcription. Average values of three independent biological replicates normalized against Act1 with standard deviation are shown as fold change over t = 0 (G1).

**Table S1.** Primers used in this study

| Name                         | Sequence (5'→ 3')                                                                                                                                                                                          |
|------------------------------|------------------------------------------------------------------------------------------------------------------------------------------------------------------------------------------------------------|
| SPE-931TLC1FWD <sup>a</sup>  | GGGTACACTAGTAGCCTTTCTAGAGGTTCC (SpeI)                                                                                                                                                                      |
| SPE-298TLC1FWD <sup>a</sup>  | GGGTACACTAGTGGTAGAGAAAGACACGG (SpeI)                                                                                                                                                                       |
| SPE+1TLC1FWD <sup>a</sup>    | GGGTACACTAGTAGAGAGGAAGATAGGTACC (SpeI)                                                                                                                                                                     |
| -6TLC1FWD <sup>a</sup>       | GAGAGGAAGATAGGTACC                                                                                                                                                                                         |
| -35TLC1FWD <sup>a</sup>      | GTGATTTTTCTGGTTTGAG                                                                                                                                                                                        |
| -91TLC1FWD <sup>a</sup>      | GGTGACATATAGATCTCAAGG                                                                                                                                                                                      |
| -150TLC1FWD <sup>a</sup>     | GGAAATGGGAGAAAAGTTTTTC                                                                                                                                                                                     |
| -248TLC1FWD <sup>a</sup>     | GTTTATAAATAAATTTTATATCAC                                                                                                                                                                                   |
| -305-224TLC1REV <sup>a</sup> | <b>GTGATATAAAATTTATTTATAAAC</b> ACGGGTAGTCTCTCTAAG                                                                                                                                                         |
| -298+20TLC1REV <sup>a</sup>  | <b>GGTACCTATCTTCCTCTCT</b> ACGGGTAGTCTCTCTAAG                                                                                                                                                              |
| -241-122TLC1REV <sup>a</sup> | <b>AACTTTTCTCCCATTTC</b> CTAACACAAGTAAATATACAACACCC                                                                                                                                                        |
| -150-70TLC1REV <sup>a</sup>  | <b>CCTTGAGATCTATATGTCACC</b> TTTTTTTTTTATTTTTTTGGCC                                                                                                                                                        |
| -87-7TLC1REV <sup>a</sup>    | <b>TTCTCAAACCGAGAAAATCAC</b> ATTGCTAAAGAGGAAGTTTTTTTCGCG                                                                                                                                                   |
| -28+20TLC1REV <sup>a</sup>   | <b>GGGTACCTATCTTCCTCTCT</b> ACTAAAAGCTACAAAGAAGGTC                                                                                                                                                         |
| +1502TLC1ECOREV <sup>a</sup> | AACAGAATTCGGGAAGGTAAATACCACC (EcoRI)                                                                                                                                                                       |
| ADH1 TERM FWD <sup>a</sup>   | CCGGAATTCGAGCTCAAGCTTTGGACTTCTTCGCC                                                                                                                                                                        |
| ADH1 TERM REV <sup>a</sup>   | ATCCGCGGACTAGTGGCCGGTAGAGGTGTGG                                                                                                                                                                            |
| TLC1-A-FOR <sup>b</sup>      | CATTTTCAGTGCAGATCCGTTGA                                                                                                                                                                                    |
| TLC1-B-REV <sup>b</sup>      | <b>CAT</b> ACGGGTAGTCTCTCTAAGCTGG                                                                                                                                                                          |
| TLC1-C-FOR <sup>b</sup>      | GGTAGAGAAAGACACGGGCAGC                                                                                                                                                                                     |
| TLC1-G-REV <sup>b</sup>      | <b>CATT</b> AGTTTTATTCTCAAACCGAGAA                                                                                                                                                                         |
| TLC1-D-FOR <sup>b</sup>      | GTTTATAAATAAATTTTATATC                                                                                                                                                                                     |
| TLC1-E-FOR <sup>b</sup>      | GGAAATGGGAGAAAAGTTTTCA                                                                                                                                                                                     |
| TLC1-F-FOR <sup>b</sup>      | GGTGACATATAGATCTCAAGGT                                                                                                                                                                                     |
| TLC1-EFA <sup>b, d</sup>     | GGAAATGGGAGAAAAGTTTTTCAGCGCGCGAACTCGCGAAAAAACTTCC<br>TCTTTAGCAATATG                                                                                                                                        |
| TLC1-ERA <sup>b, d</sup>     | <b>CAT</b> ATTGCTAAAGAGGAAGTTTTTTTCGCGAGTTCGCGCGCTGAAAACCT<br>TTCTCCATTTC                                                                                                                                  |
| ADH1-FORW <sup>b, d</sup>    | ACACAGAATTCAGAAGCTTTGGACTTCTTC                                                                                                                                                                             |
| ADH1-REV <sup>b, d</sup>     | ATGACGAATTCGGGCATGCCGGTAGAG                                                                                                                                                                                |
| TLC1-33-49 <sup>c</sup>      | CAGCCATTGACATTTTC                                                                                                                                                                                          |
| LACZ2 <sup>c</sup>           | GCAAGGCGATTAAGTTGGG                                                                                                                                                                                        |
| CYC1-FOR <sup>d</sup>        | CCTACCTGAATCTAAAATTCCC                                                                                                                                                                                     |
| CYC1-REV <sup>d</sup>        | CATTATTAATTTAGTGTGTATTTGTG                                                                                                                                                                                 |
| CAR1-FA <sup>d</sup>         | TTAGCGGTAGCCGCCGAGGGGTCTAAAGAGTA                                                                                                                                                                           |
| CAR1-RA <sup>d</sup>         | TACTCTTTAGACCCCTCGGCGGCTACCGCTAA                                                                                                                                                                           |
| ACT1 coding For <sup>d</sup> | TCCGGTGATGGTGTACTCA                                                                                                                                                                                        |
| ACT1 coding Rev <sup>d</sup> | ATTCTCAAAATGGCGTGAGG                                                                                                                                                                                       |
| TLC1-DFA <sup>d</sup>        | GTTTATAAATAAATTTTATATCACTATATGTGTGGTAAAAGGAAGAGCA<br>ATCCTGCTAAAGCTTTTATATCTAAACGCCAAAAAAATAAAAAA<br>TTTTTTTTTTATTTTTTTGGCGTTTAGATATAAAAGCTTTAGCAGGATTGC<br>TCTTCCTTTTACCACACATATAGTGATATAAAATTTATTTATAAAC |
| MCB1/2b-Rev <sup>e</sup>     | GGTCTTTTAATTGAGAACC <b>TGAGATCT</b> ATATGTCACCATTGCTAAAGAG<br>GAAGTTTTTCCAGAGTTCCCGAGCTGAAAACTTTTCTCCATTTC                                                                                                 |
| MCB1mutF <sup>e</sup>        | GTTTTCAGCGCGCGAACT <u>GGCT</u> AAAAAACTTCTCTTTAG                                                                                                                                                           |
| MCB1mutR <sup>e</sup>        | CTAAAGAGGAAGTTTTTT <u>AGCC</u> AGTTCGCGCGCTGAAAAC                                                                                                                                                          |
| MCB2mutF-2 <sup>e</sup>      | GGGAGAAAAGTTTTTCAGC <u>TCGG</u> GAACT <u>GGCT</u> AAAAAACTTC                                                                                                                                               |
| MCB2mutR-2 <sup>e</sup>      | GAAGTTTTTT <u>AGCC</u> AGTTCCCGAGCTGAAAACTTTTCTCC                                                                                                                                                          |

<sup>a</sup>Oligonucleotides used for PCR deletion strategy. Underlined sequences are restriction sites added for subsequent cloning (corresponding restriction enzyme is in parenthesis), bold nucleotides include sequences located on both sides of the deleted region.

<sup>b</sup>Oligonucleotides used for PCR amplification of *TLC1* promoter region, bold nucleotides in the reverse primers are added sequences corresponding to the “start codon ATG”.

<sup>c</sup>Oligonucleotides used for primer extension and Northern blot analysis.

<sup>d</sup>Oligonucleotides used for PCR amplification of *CYC1* promoter regulated by different *TLC1* promoter regions.

<sup>e</sup>Oligonucleotides used for site-directed mutagenesis; underlined nucleotides correspond to the mutations introduced in the MCB sequence.

-640      -630      -620      -610      -600      -590      -580      -570      -560      -550      -540      -530      -520      -510      -500      -490      -480      -470      -460  
 Scec AGTCATTTTCAGTGCAGATCCGTG--AAGTGTACTACTGGTCTAGGTAGAGTATCTTTAAAATATCTAATCATGCAAATTAGTCATT---TCTTCTTTCTTATAAGTTGCGGCCCTTC-TAGTATTTACAATTTACCCGGGCTGG-TTCTGGTGGCATCTATAAGAGCTCTATCTGGCTGCTAAGCAGACTTGCTGTT  
 SceK AGTCATTTTCAGTGCAGATCCGTG--AAGTGTACTACTGGTCTAGGTAGAGTATCTTTAAAATATCTAATCATGCAAATTAGTCATT---CTTCTTTCTTATAAGTTGCGGCCCTTC-TAGTATTTACAATTTACCCGGGCTGG-TTCTGGTGGCATCTATAAGAGCTCTATCTGTCTGCTAAGCAGACTTGCTGTT  
 Spar AGTCATTGTCCGGTGCAGATCTGTG--AAGTGTACTACTAGTTPATGTACAGTATCTTTCAAAGCCTTAATCATGCAGATTAGTCATT---TCTTCTTTCTTCCAAGTTGCGGCCCTTC-TAGTACTTACAATTTACCCGGGCTAGCTTCCGGTGGCATCTATAAGAGCACTATTTGGGTTGGTGTAGTACCCGCTCAT  
 Scar AGTCATTGTCCGGTGCAGATCTGTG--AAGTATCTACTAGTTTACGTTTCAGTATCCTTCAAAGCTTTAATCATGCAGATTAGTCATT---TCTTCTTTCTTCCAAGTTGCGGCCCTTC-TAGTACTTACAATTTACCCGGGCTTGGTCCGGTGGCATCTACAAGAGCACTTTTGGAGCTGGTGTAGTACCCGCTCAT  
 Smik AGTCATTGTAGGTGCAGATGCTAC--GAGTGTGCTCTTAGTATGGTGTGCTGATTCTCTAATGCGTTAACTATGTAGATTAGTCATT---TCTTCTTTGTT-CATGTTGCGGCCCTTCACAGTACTTACAAATTTACCCGGTTCCTGTCCCTCGCGGAATTTATTAGAGCACTTTTGAATGTTAAGCAGACTTAGTCAT  
 Skud AGTCATTGTCCGGTGCAGATATGTG--AAGTGTGCTTCTGGTTTGG-TAC-GTTTCTTGCAAAACATAAATCATATACATTAGTCATT---TCTTCTTTCTT-TAAGTTGCGGCCSCKGC--AGCCCTTATGGTTTACCCGGCACCCACTTTCAGTGGCAGCTATAAGAGCATCATTTAGCTGTTGAGCAATCCAGCAGT  
 Sbay AGTCATTGTCCGGTGAATATATGT---AGTGTGCTATTCGTTTGGACCAG-TTTTCTTATAGAGCATTAGTCATACAGATTAGTCTTTGCTTCTTCTTCTT-CAGGTTACGACCTCTTCTGACCTGCTAAATTTACCCGGC-CCCACTCCAATTTGGCAGCCACAAGAGGGCCACTGGGTTGTTGCGCAGC-CTTAAGAT  
 Spas AGTCATTGTCCGGTGCAGATATGTGTAGAGTGTGGTAGTGTGTTGGCTAC-GTTTCTTGCAGAGATTAAATCATACAGATTAGTCATTCTTCTTCTTCTT-CAAGTTGCGAGCCCTTCAAACCCGCTGGTTTACCCGGC-CTGCGCAAAATGGCAGCCATAAGAGAGTCTTTGGGTTGATGTGCGAGGCCAAGGT  
 Cons AGTCATTgTc.GTgcAgAT..gt....AgTgTgcTa.T.GT.T...ta..gT.TctT..Aaa....TAatcAT.cAgATTAGTCaTT....CTTCTTTcTtT..AaGTTgCG.cCcc.tc..ag...Tta.aatTTACCCGG..c..g.t.c..gtGGcA.ctAtaAGAgc.c.attg.g.TG.T..GcAga.....T

DEL [ <-----A-----> ] (35.8)

-450      -440      -430      -420      -410      -400      -390      -380      -370      -360      -350      -340      -330      -320      -310      -300      -290      -280      -270  
 Scec ACTTGTATGTGCTGTTTATCAAGATT-GGGGCAT----TACGCATGTGTATGTGTGAACACTACAGTAGTGTATGAAATACAGCCTGAA-AGAC-GAAAACCTTCACAACGGAACTTAAGCGGTTCAATAAA-CATCTATCTGCCAGCTTAGAGAGACTACCCGTTGGTAGAGAAAAGACACGGGCAGCCAAAAATACTGGGTG  
 SceK ACTTGTATGTGCTGTTTATCAAGATT-GGGGCAT----TGCGCATGTGTATGTGTGAACACTACAGTAGTGTATGAAATACAGCCTGAA-AGAC-GAAAACCTTCACAACGGAACTTAAGCGGTTCAATAAA-CATCTATCTACCAGCTTAGAGAGACTACCCGTTGGTAGAGAAAAGACACGGGCAGCCAAAAATACTGGGTG  
 Spar ATTTGCATATACTGCTTACCAAGATT-AGGTGTG----TACGCGTGTGTATGTGTGAACACTACAGTAGTGTATGAAATACAGCCTGAA-AGACGAAAAACTTCACAACGGAACTTAAGTGGTTCATTAAA-CATCTATCTGCCAGCTTAGAGAGACTACCCGTTGGTAGAGAAAATACGCGGGCAGCCAAAAATACTGGGTG  
 Scar ATTTGCATATACTGCTTACCAAGATT-AGATGTG----TACGTATGTGTATGTGTGAACACTACAGTAGTGTATGAAATACAGCCTGAA-AGGCTAAAAACTTCACAACGGAACTTAAGTGGTTCATTAAA-CATCTATCCGCCAGCTTAGAGAGACTAACCGTAGGTGAGAAAATACGCGGGCAGCCAAAAATACTGGGTG  
 Smik ATTTGGCGTGATTGTTTACTAAGATCCGAGTATT----TACGTATCTATATGTGTGAACACTACAGTAGTGTATGAAATACAGCCTAAAGAGACGAGAACTTCACAACGGAACTTAAGTGGTTCATTAAAATATCTATCTACCAGCTTAGAGAGACTACCCATGAGTGGGAGATACGCGGAGCAGCCAAAAATACTGGGTG  
 Skud CCTGGTGCATGCTGCCTATCAAGATTGGTGTACGATGGTGTGCGGTGTGTGCGAACTACAGTAGTGTATGAAATACAGTCTTTAAAGACTAACAACTTCACAACGGAACTTAAGTGGTTCATTGA-ACGCTATCTGCCAGCTTAGAGAGGCCACCAACGGGTGAGTGTATACGCGGGTGGCCGAAAAATACTGGATG  
 Sbay GCCAGTGTGTTGTTCTTGTCAAGNC----TAC-----TGTGTGTCGGGTGTGTGAACACTACAGTAGTGTATGAAATACAGCCT--GAAGGG-AAAAACTTCACAACGGAACTTAAGTGGTTCATCGAGCTGTTTATCTGCCAGCTTAGAGTAAACCATCCGCGGTGAGTGTATGCGCGGGCAGTCAATGATACTGG--G  
 Spas ACCAGAGTATGGTCTTGTCAAGGTT-----TAC-----TGTGTGTGAACACTACAGTAGTGTATGAAATACAACT--AAATGGCAAAACTTCACAACGGAACTTAAGTGGTTCATCGAGTGTGTTTATCTGCCAGCTTAGAGTAAACCATCCGCGGTGAGTGTATGCGCGGGCAGTCAATAACTG--G  
 Cons a.t.G..t.T..Tg.tTa.caAGatt.....T.c.....t.TGTgtGAACACTACAGTAGTGT.ATGAAATACA.cCT..a.Ag.c.aaaAACTTCACAACGGAaCTTAAGTGGTTCAtt.A..c.TcTATctgCCAGCTTAGAGagaC.A.Ccg.gggtGag..ataCgCgGcAaGcCaAaaATACTGG..G

DEL ----->] [ <-----B-----> ] [ <-----C-----> ] (69.6) (52.6)

-260      -250      -240      -230      -220      -210      -200      -190      -180      -170      -160      -150      -140      -130      -120      -110      -100      -90  
 Scec -TTGTATATTTACTTG----TGT-TAGTTTATAAATAA--ATTTTATACTACT--ATATGTGTGGTGAA-AAGGAAGAGCAATCCTGCTAAAGCTTTT-ATATCTAAACGCCAAAAAATAAAAAA-----GGAAATGGGAGAAAA-GTTTTCAAGCGCGGAAC-TCGCGAAAAAACTTCCTCTTTAGCAATGGTG-  
 SceK -TTGTATATTTACTTG----TGT-TAGTTTATAAATAA--ATTTTATATCACT--ATATGTGTGGTGAA-AAGGAAGAGCAATCCTGCTAAAGCTTTT-ATATCTAAACGCCAAAAAATAAAAAA-----GGAAATAGGAGAAAA-GTTTTCAGCGCGCGAAC-TCGCGAAAAAACTTCCTCTTTAGCAATGGTG-  
 Spar -TTGTATTTTACTTG----GGT-TAGTAGGAAAAGG-ATTTTATATATAAC--AAAATATATGGTGAAGAAAAGAGCAATTCGCCAAAGCTTTTTATATCTAAATGCCAGAAAAAATAAAAA-----GGAAATAGGAGAAAA-GTTTTCAGCGCGCGAAG-TC-SGAAAAAC-GTCTACTTCAGTAATGGCG-  
 Scar -TTGTATTTTACTTG----GGT-TAGTAGGAAAAGACAT-TATATATAAC--AAAGTATATGGGGAAGAAAAGAGGAGCAATTCGCCAAAGCTTTTTATATCTAAATGCCAGAAAAAATAAAAA-----GAAATAGGAGAAAA-GTTTTCAAGCGCGGAAC-TCGCGAAAAAAGTCTACTTTCAGTAATGAGC-  
 Smik -TTGTAT-TTTACTTGCTTTTATATTGCAAGCAAGCAAGATGTATCTATATATGCAATGCATGATTA-GAAAAAGAGCAGGCCGTC-AAAGATGTCTATATTTAAATAGCAAAAAAAGAA-----GTATAGGAGAAAA-GTTTTCAGCGCGCGCAAT-TCGCGAAAAACCGTTCTCTTTTCCAACAGCAT  
 Skud TTTGTAT-TTTACTTGATTTTATGTGTCAAGAGAACACAG-----TATA-CAAACAATAGTGGTAAAGAATGAGAACAAGACTTGC-ATTGTTCCCTGTATTTAAATGCCA-----GAAGAAAA-GTTTTCAGCGCGTAAAAATCGCAAAAACTGCCAATTCGCGCAATG-A-  
 Sbay GTTATAC-TTTACTTGGTTTTTATATTGCAAGGAAACAGAG-----TATA-CTAAGAACAATGGCAGAAAA-GAGCTCCGATTTTGA-AATGCTTCTTATATCTAAATGGAAAAAATA-----CAATAGAGAAAAAGTTTTCCAGCGCGCGAAT-TCGCAAAAAAGTACCTATTTCAATACCGGTG-  
 Spas GTT-TAC-TTTACTTGGTTTTAT-TTGAAAGGAAGCAAG-----TATA-CAAGAGAGTATTTGGTGGAAAA-GAGCACCAGAAATTTGA-AATGTTTCTTATATCTAAATGAAAAAATAAAAA-----CGACAAAGAAAAAATTTTTCAGCGCGCGAAT-TCGCGAAAAACTGCCTATTTTCATCATCGATA-  
 Cons .TT.TAt.TTTACTTG...t.T.T.g.a.g.aAa.a.....TAta.c....A...TGgtgaa.aA.gA..a.caa...Tgc.Aa.G.Tt...aTAtcTAAAcg..A.....g.A.AAAA..TTTtCagCGCgGAA..TC.cgAAAAA...c...TT.A..Aa.gg...

DEL ----->] [ <-----D-----> ] [ <-----E-----> ] (21.4) (42.4)

-80      -70      -60      -50      -40      -30      -20      -10      +1 TLC1  
 Scec AC-ATA-TAGATCTCAAGGTTTC----TCAA-----TTAAAAGACTTC--TTTGTAGCTTTTAGTGTGATTTTTCTGGTTTGA-----GAATA----A--AACTA--GAGAGGAA  
 SceK AC-ATA-TAGATCTCAAGGTTTC----TCAA-----TTAAAAGACTTC--TTTGTAGCTTTTAGTGTGATTTTTCTGGTTTGA-----GAATA----A--AAATA--GAGAGGAA  
 Spar GC-ATA-CAGATCTCGAGCTTC----TCGG-----TTTAAAGGCTTTC--TTTATAGCTTTCAATACGACTTATCCGGTTCGA-----GAATA----CA----CTA--CAAAGGAA  
 Scar GC-GTA-CAGATCTCGAGCTTC----TCAG-----TTTAAAGGCTTTC--TTTATAGCTTTTCAGTGCAGCTTATCCGGTTTGA-----CAATA----CA----CTA--TAGAGGAA  
 Smik ACTACAAAGCTCTCGACATA----TCAG-----TTAAAAGGCTTCT--TTTATGGTTTCCAGCTGAGTCCCTCAATAGTGTCTTCCAATAGGCGCATGCGCTA--ATAGAGAA  
 Skud -C-ATA-CAGATCTCGAACATC----TCAC-----TTCAGATGTATTCT--TTCGTANNTTTCAAAACAGACCATCC----GATCG--AA----GCATGCGCTT--ATGAGGAA  
 Sbay -C-ATA-TGATCTCGAGCATTTAAATTCAGCCTTGTGTCAGCAATGCAGATACCTTCCGTTGGCAGTTTTCAATACGGATCATCCG-ATTG-TC-----GCATGTGCTCATGAGAGGAA  
 Spas -C-ACA-TAGATCTCGAGCATCAAAATCACGCTTGTGTCAGCAACACATTCGGATACCTTTTGTTCAGCTTCAATACAGATCATCCG-ATCG-T-----GGCATGTGCTTATGAGAGGAA  
 Cons .C.atA..aGaTCTCgAgc.Tc....TCa.....Tt.aaA..c.Ttc..TT..tag.tTtca.t....t.c.....g.....A....cT....gAGGAA

DEL ----->] [ <-----F-----> ] [ <-----G-----> ] (32.1) (14.3)

A

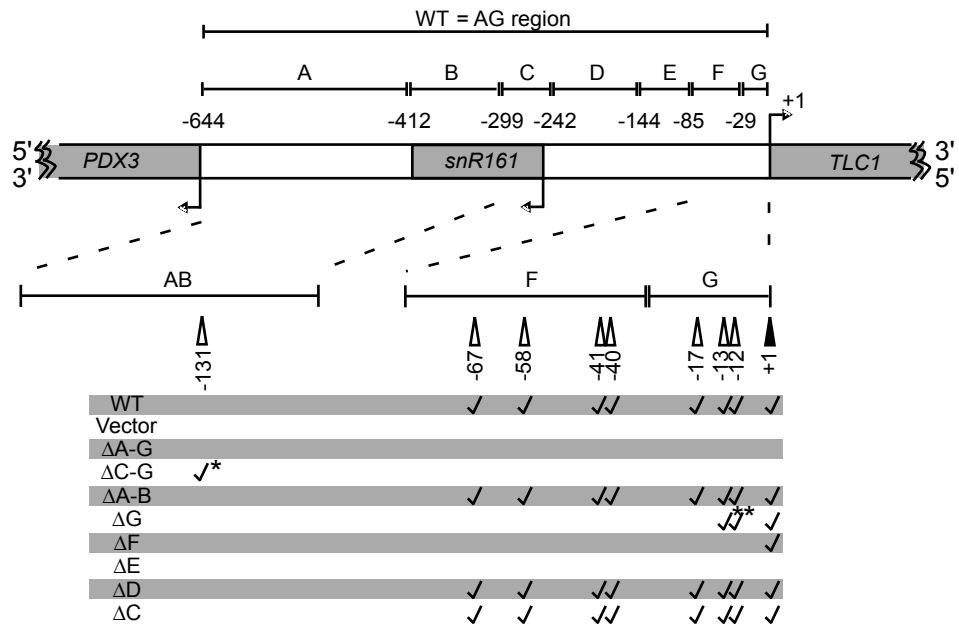

B

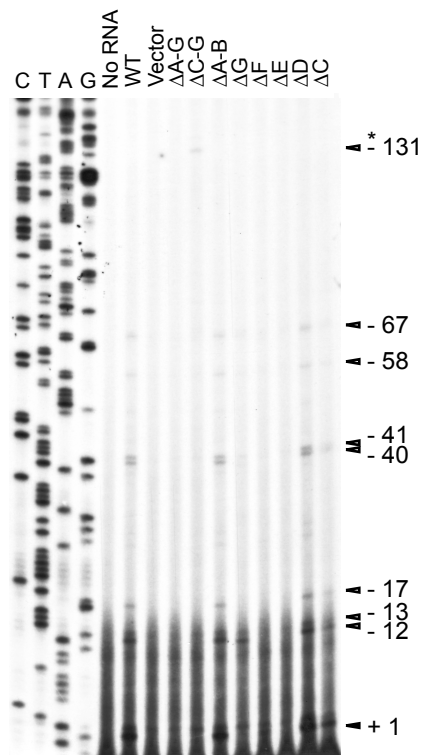

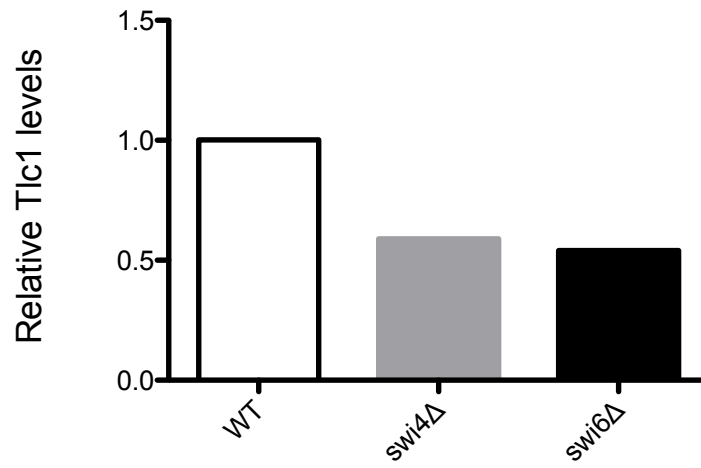

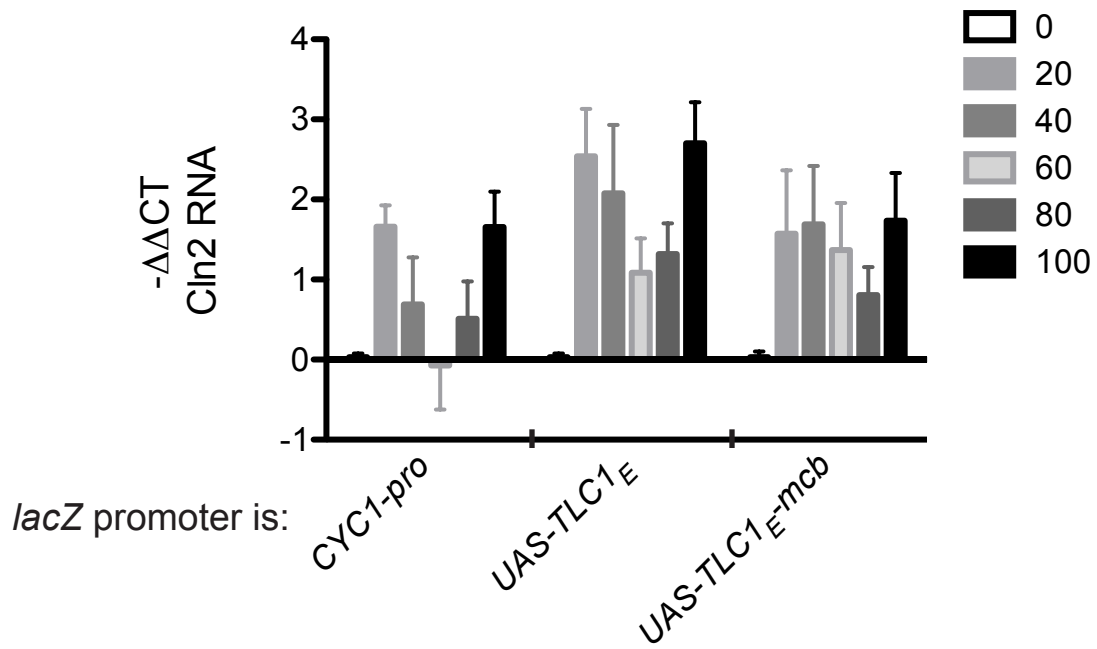

Supplement: SuppMaterial.pdf [file SuppMaterial.pdf]
